# Supplementary material for: Clinical and Echocardiographic Risk Factors Predict Late Recurrence after Radiofrequency Catheter Ablation of Atrial Fibrillation
Source: PubMed Central journal article supplement (PMC6499800; doi:10.1038/s41598-019-43283-7), 2019-05-03
Supplement: 41598_2019_43283_MOESM1_ESM.pdf [file 41598_2019_43283_MOESM1_ESM.pdf]

**Clinical and Echocardiographic Risk Factors Predict Late Recurrence after  
Radiofrequency Catheter Ablation of Atrial Fibrillation**

Yun Gi Kim, MD; Jong-Il Choi, MD, PhD, MHSc\*; Ki Yung Boo, MD; Do Young Kim, MD;  
Suk-Kyu Oh, MD; Hee-Soon Park, MD; Kwang-No Lee, MD; Jaemin Shim, MD, PhD; Jin  
Seok Kim, MD, PhD; Sang Weon Park, MD; Seong-Mi Park, MD, PhD; Wan Joo Shim, MD,  
PhD; Young-Hoon Kim, MD, PhD.

Division of Cardiology, Department of Internal Medicine, Korea University College of  
Medicine and Korea University Medical Center, Seoul, Republic of Korea

**\* Address for correspondence**

Jong-Il Choi, MD, PhD, MHSc

Division of Cardiology, Department of Internal Medicine, Korea University College of  
Medicine and Korea University Medical Center, Seoul, Republic of Korea

73 Incheon-ro, Seongbuk-gu, Seoul 02841, Republic of Korea.

Tel: 82-2-920-5445

Fax: 82-2-927-1478

E-mail: jongilchoi@korea.ac.kr

**Brief title:** Risk stratification of AF recurrence

**Supplementary Table S1.** Baseline characteristics of the study population.

|                                              | <b>Total population (N = 2,352)*</b> |
|----------------------------------------------|--------------------------------------|
| <b>Clinical findings</b>                     |                                      |
| Age (years old)                              | 55.4 ± 10.9                          |
| Male sex                                     | 1,872 (79.6%)                        |
| BMI (kg/m <sup>2</sup> )                     | 24.9 ± 3.0                           |
| Non-paroxysmal AF                            | 945 (40.2%)                          |
| AF duration (year)                           | 4.8 ± 4.7                            |
| Heart failure                                | 180 (7.7%)                           |
| Hypertension                                 | 865 (36.8%)                          |
| Diabetes mellitus                            | 259 (11.0%)                          |
| Previous CVA, TIA, or systemic embolism      | 185 (7.9%)                           |
| Vascular disease                             | 220 (9.3%)                           |
| CHA <sub>2</sub> DS <sub>2</sub> -VAsc score | 1.3 ± 1.3                            |
| <b>TTE findings</b>                          |                                      |
| LA diameter (mm)                             | 41.1 ± 6.0                           |
| LV ejection fraction (%)                     | 54.9 ± 6.2                           |
| E over E'                                    | 8.9 ± 4.0                            |
| <b>TEE findings</b>                          |                                      |
| LAA average velocity (cm/sec)                | 48.6 ± 21.0                          |
| SEC                                          | 456 (21.4%)                          |
| Dense SEC                                    | 77 (3.6%)                            |
| Thrombus                                     | 5 (0.2%)                             |
| <b>Laboratory findings</b>                   |                                      |
| WBC (10 <sup>3</sup> /μL)                    | 6.5 ± 3.4                            |
| Hemoglobin (g/dL)                            | 14.7 ± 1.4                           |
| Platelets (10 <sup>3</sup> /μL)              | 207.6 ± 49.2                         |
| Serum creatinine (mg/dL)                     | 1.0 ± 0.4                            |

\*Results are presented as n (%) or means with standard deviations.

AF: atrial fibrillation; BMI: body mass index; CVA: cerebrovascular accident; LA: left atrium; LAA left atrial appendage; LV: left ventricle; SEC: spontaneous echocontrast; TEE: transesophageal echocardiography; TIA: transient ischemic attack; TTE: transthoracic echocardiography; WBC: white blood cells.

## Supplementary figure legends

Figure S1

a Duration of AF

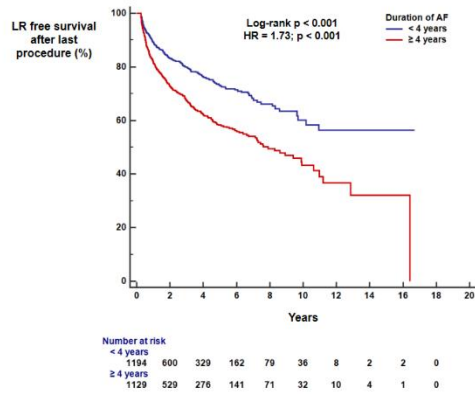

b Age

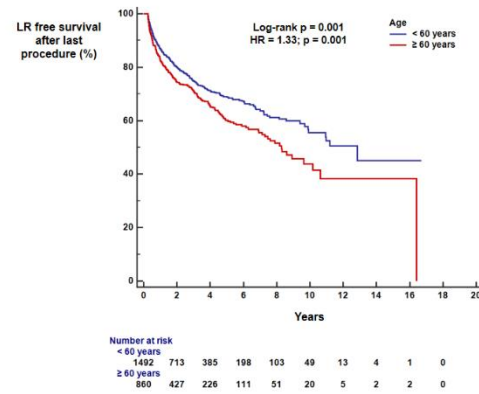

c Type of AF

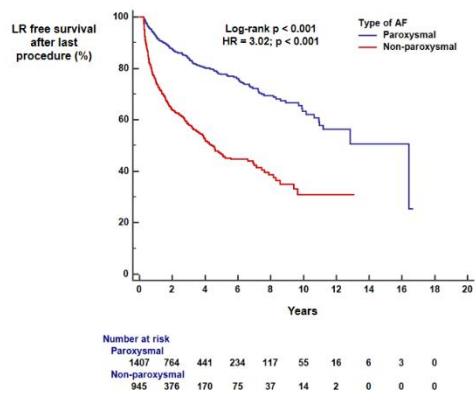

d Diabetes

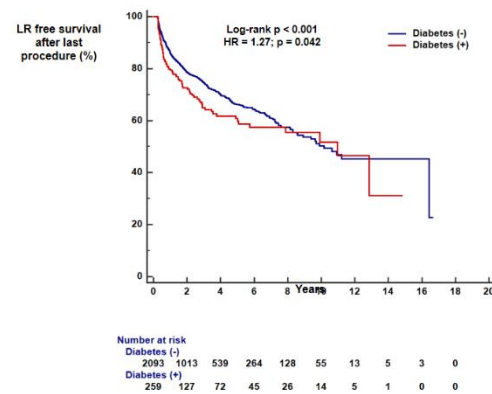

### Supplementary Figure S1. Influence of clinical parameters on LR.

Kaplan-Meier curve analysis of the cumulative incidence of LR following the last RFCA for the full follow-up duration according to AF duration (**a**), age (**b**), AF type (**c**), and diabetes (**d**). AF: atrial fibrillation; HR: hazard ratio; LR: late recurrence; RFCA: radiofrequency catheter ablation.

Figure S2

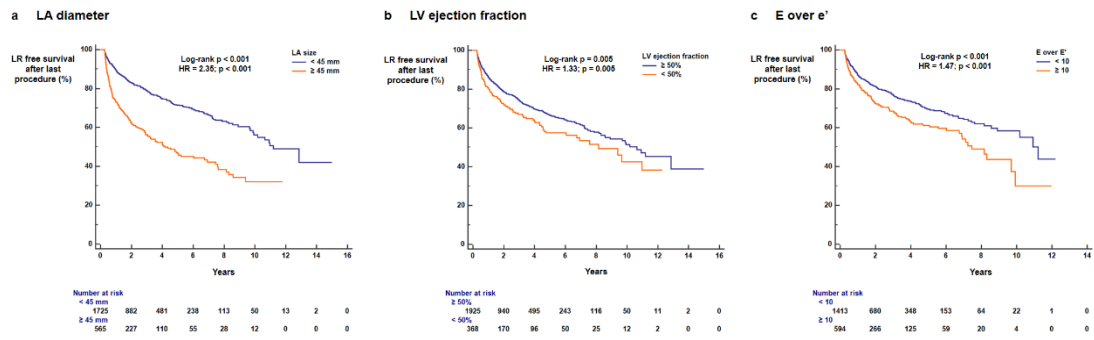

### Supplementary Figure S2. TTE risk factors for LR.

LA diameter  $\geq 45.0$  mm **(a)**, LV EF  $< 50\%$  **(b)**, and E/E'  $\geq 10$  **(c)** were significantly associated with increased risk of LR following the last RFCA (full follow-up duration).

HR: hazard ratio; LA: left atrium; LR: late recurrence; LV: left ventricle; RFCA: radiofrequency catheter ablation; TTE: trans-thoracic echocardiography.

Figure S3

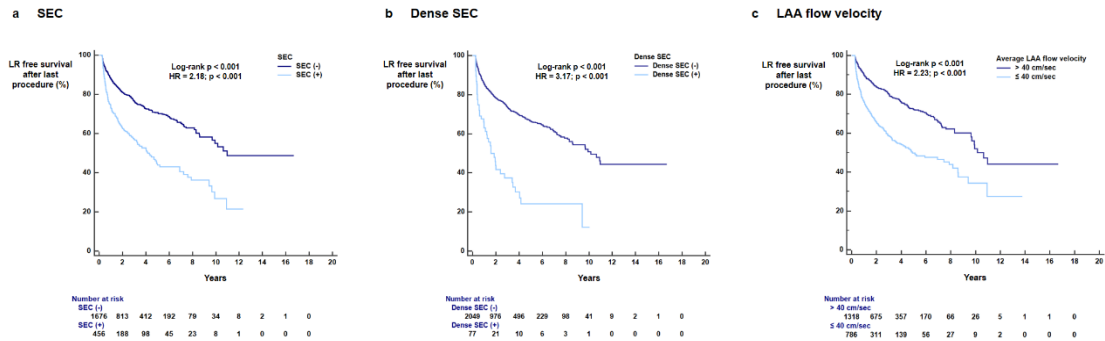

### Supplementary Figure S3. TEE risk factors for LR.

Presence of SEC (a), dense SEC (b), and decreased LAA flow velocity (c) were significantly associated with increased risk of LR following the last RFCA (full follow-up duration).

HR: hazard ratio; LAA: left atrial appendage; LR: late recurrence; RFCA: radiofrequency catheter ablation; SEC: spontaneous echocontrast; TEE: trans-esophageal echocardiography.

**Figure S4**

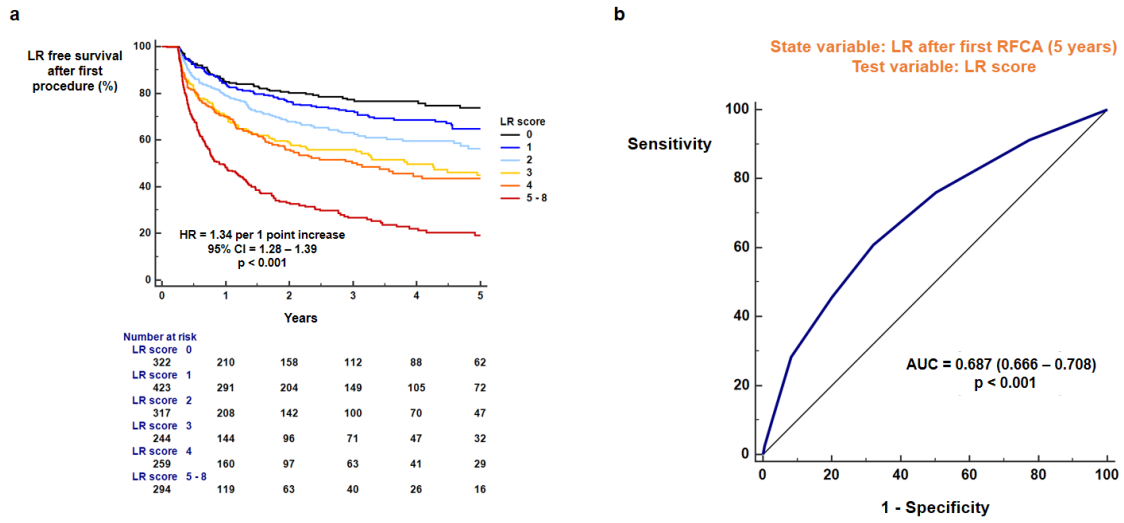

**Supplementary Figure S4.** Predictive value of the LR score for LR following first-time RFCA.

**(a)** Risk of LR after first-time RFCA according to LR score.

**(b)** ROC curve analysis of the LR score for the prediction of LR following first-time RFCA.

AUC: area under curve; HR: hazard ratio; LR: late recurrence; RFCA: radiofrequency catheter ablation; ROC: receiver operating characteristic.

**Figure S5**

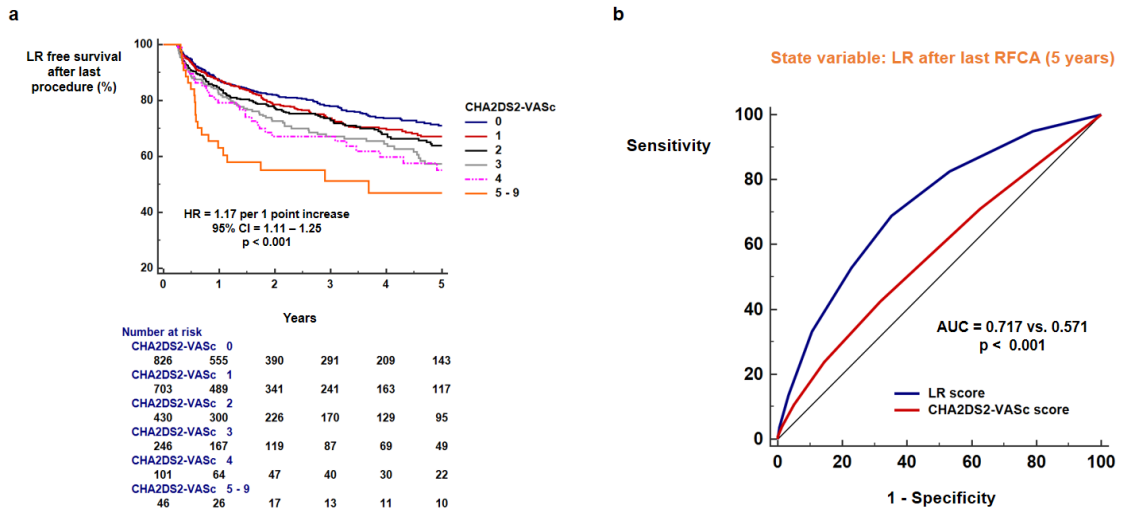

**Supplementary Figure S5.** Predictive value of CHA<sub>2</sub>DS<sub>2</sub>-VASc score.

**(A)** Risk of LR stratified by CHA<sub>2</sub>DS<sub>2</sub>-VASc score.

**(B)** ROC curve analysis of the LR score which showed significant predictive value. However, LR score outperformed CHA<sub>2</sub>DS<sub>2</sub>-VASc score.

AUC: area under curve; CI: confidence interval; HR: hazard ratio; LR: late recurrence; RFCA: radiofrequency catheter ablation; ROC: receiver operating characteristic.
